# Supplementary material
Source: ML conference proceedings conference paper supplement (https://proceedings.neurips.cc/paper_files/paper/2020/hash/305ddad049f65a2c241dbb6e6f746c54-Abstract.html)

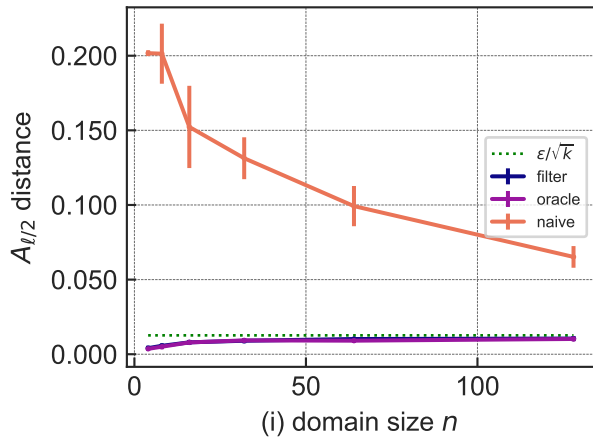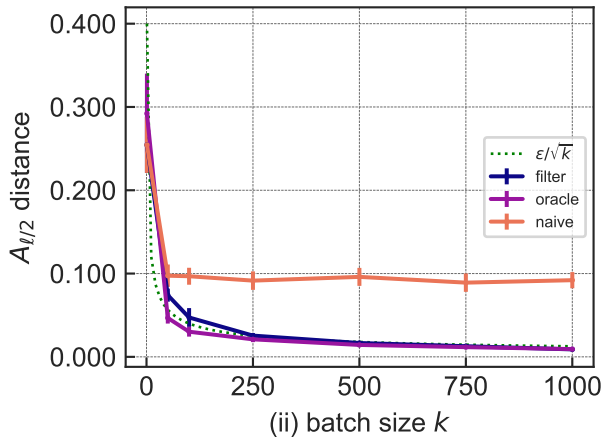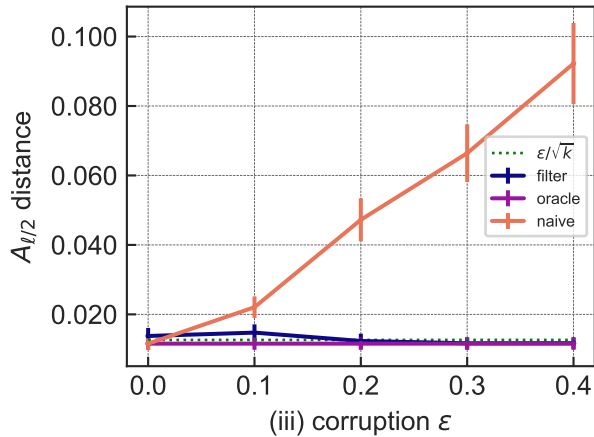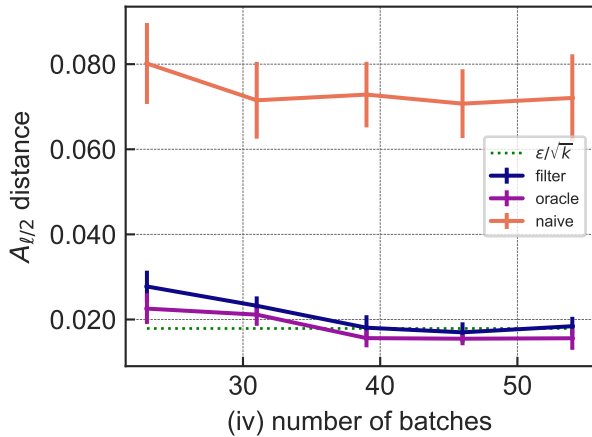

Supplement: Supplementary file [file 305ddad049f65a2c241dbb6e6f746c54-Supplemental.zip]
